# Supplementary material
Source: Springer Nature journal article supplement (https://www.springermedizin.de/resource/supplementary/12974_2008_172_MOESM5_ESM.pdf/9600958)

### Fas mRNA

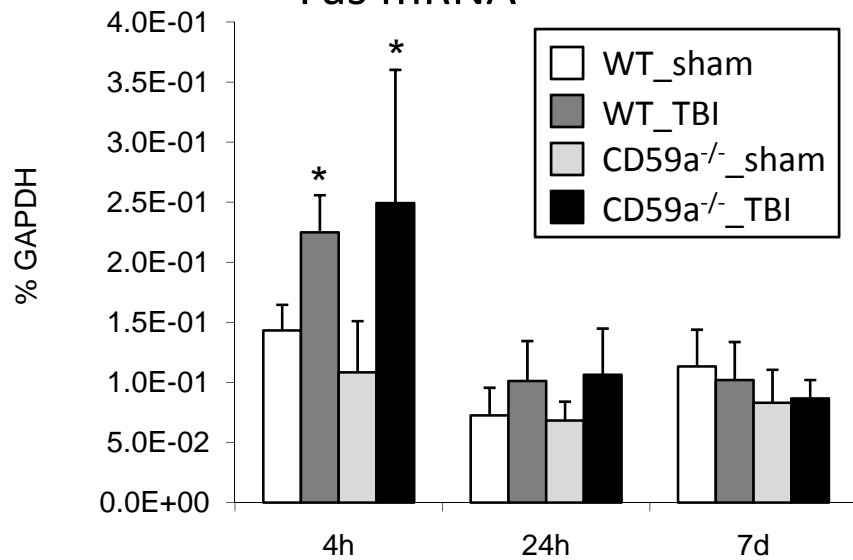

### FasL mRNA

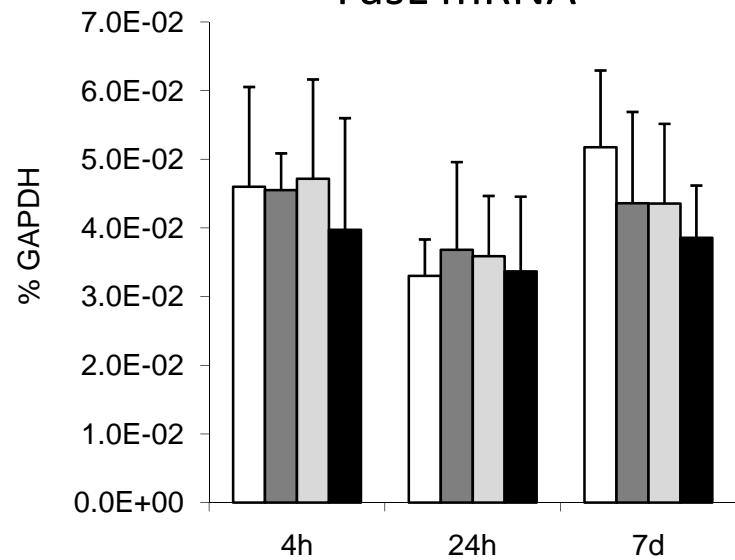

### Bax mRNA

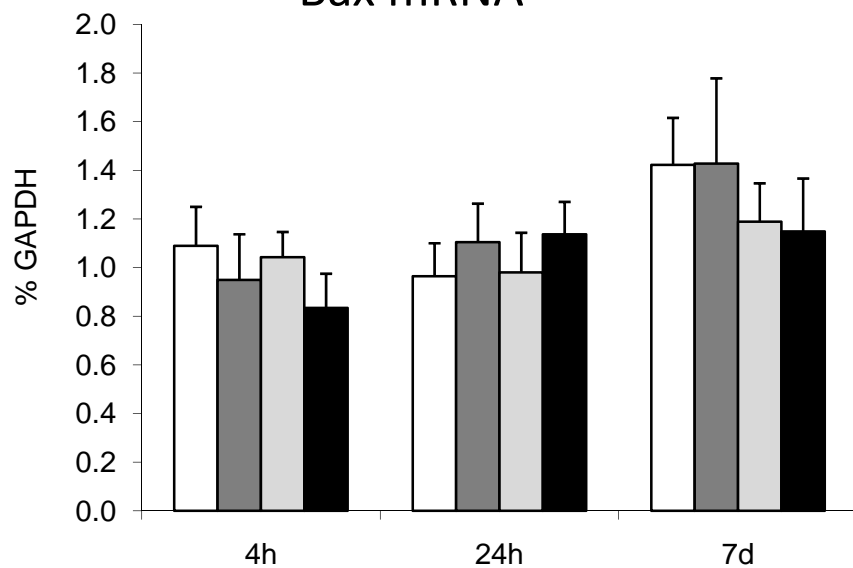

### Bcl-2 mRNA

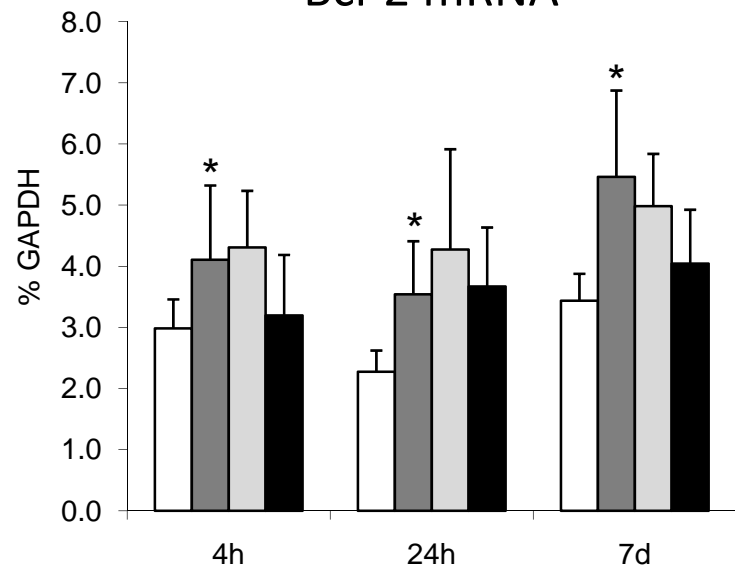

Supplement: MOESM5 [file 9600958]
